# Supplementary material
Source: publisher figshare collection journal article supplement (https://tandf.figshare.com/articles/dataset/_/11662230)
Supplement: Supplementary file 1 [file 1]

## Supplemental Online Material

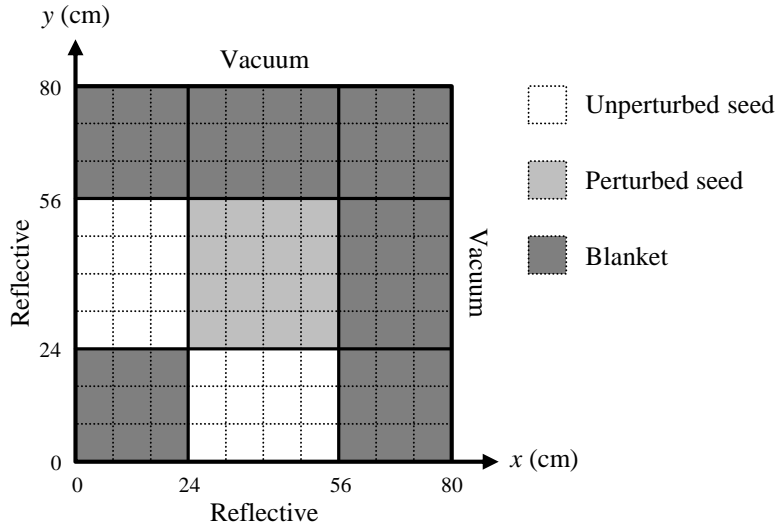

**Figure S1.** Top view for the TWIGL benchmark problem

**Table S1.** Material properties of the TWIGL benchmark problem

| Material | Energy group | $\Sigma_{tr,g}$<br>(1/cm) | $\Sigma_{a,g}$<br>(1/cm) | $\nu\Sigma_{f,g}$<br>(1/cm) | $\Sigma_{s,g\rightarrow 1}$<br>(1/cm) | $\Sigma_{s,g\rightarrow 2}$<br>(1/cm) | $\chi_g$<br>(-) |
|----------|--------------|---------------------------|--------------------------|-----------------------------|---------------------------------------|---------------------------------------|-----------------|
| Seed     | 1            | 0.23810                   | 0.01000                  | 0.00700                     | 0.21810                               | 0.01000                               | 1.0             |
|          | 2            | 0.83333                   | 0.15000                  | 0.20000                     | 0.00000                               | 0.68333                               | 0.0             |
| Blanket  | 1            | 0.25641                   | 0.00800                  | 0.00300                     | 0.23841                               | 0.01000                               | 1.0             |
|          | 2            | 0.66667                   | 0.05000                  | 0.06000                     | 0.00000                               | 0.61667                               | 0.0             |
| $\nu$    |              | $\nu_1$ (cm/sec)          | $\nu_2$ (cm/sec)         | $\beta$ (-)                 | $\lambda$ (1/sec)                     |                                       |                 |
| 2.43     |              | $10^7$                    | $2\times 10^5$           | 0.0075                      | 0.08                                  |                                       |                 |



**Table S2.** Calculation conditions of the C5G7-TD benchmark problem

| Parameters                                       | Calculation conditions                                                                             |
|--------------------------------------------------|----------------------------------------------------------------------------------------------------|
| Azimuthal division                               | 128 for $2\pi$ with cyclic quadrature set                                                          |
| Polar division                                   | 3 for $\pi/2$ with TY-opt quadrature set                                                           |
| Ray separation                                   | 0.01 cm using cyclic ray tracing                                                                   |
| Convergence criterion                            | Fission : $10^{-6}$ , flux : $10^{-6}$                                                             |
| Flux region division                             | Reflector cell : 0.42 cm x 0.42 cm square mesh<br>Other cells : 24 flux regions shown in Figure S4 |
| Source approximation                             | Linear                                                                                             |
| MAF method                                       |                                                                                                    |
| Time discretization                              | (Fully implicit method for the shape and amplitude functions)                                      |
| Time step size                                   | $\Delta t_{shape} = 1 \text{ sec}$ , $\Delta t_{amp} = 1 \text{ msec}$                             |
| Coarse mesh structure for the amplitude function | 1.26 cm x 1.26 cm square mesh                                                                      |

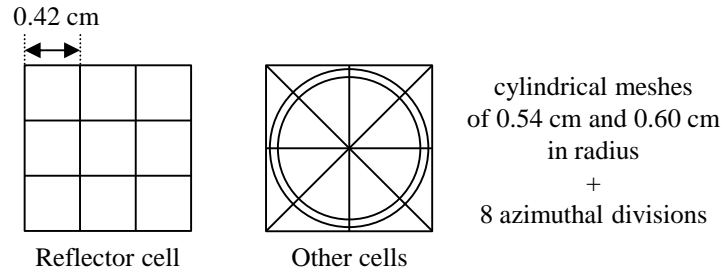**Figure S4.** Flux region division**Table S3.** Comparison of the initial eigenvalue for the C5G7-TD benchmark problem

|                   | MCNP<br>(reference)  | MPACT [6] | Present study |
|-------------------|----------------------|-----------|---------------|
| Initial $k_{eff}$ | $1.18646 \pm 0.07\%$ | 1.186673  | 1.186507      |
| Relative error    | -                    | +18 pcm   | +4 pcm        |

**Table S4.** Core power transition of the C5G7-TD benchmark problem (1/3)

| Time<br>(sec) | TD 1-1  | TD 1-2  | TD 1-3  | TD 1-4  | TD 1-5  | TD 2-1  | TD 2-2  | TD 2-3  | TD 3-1  | TD 3-2  | TD 3-3  | TD 3-4  |
|---------------|---------|---------|---------|---------|---------|---------|---------|---------|---------|---------|---------|---------|
| 0.0           | 1.00000 | 1.00000 | 1.00000 | 1.00000 | 1.00000 | 1.00000 | 1.00000 | 1.00000 | 1.00000 | 1.00000 | 1.00000 | 1.00000 |
| 0.1           | 0.93712 | 0.99112 | 0.99434 | 0.92450 | 0.91694 | 0.59950 | 0.91943 | 0.94784 | 0.87384 | 0.77433 | 0.69393 | 0.62767 |
| 0.2           | 0.87817 | 0.98194 | 0.98850 | 0.85545 | 0.84209 | 0.42273 | 0.84857 | 0.89993 | 0.76850 | 0.62005 | 0.51708 | 0.44159 |
| 0.3           | 0.82442 | 0.97264 | 0.98256 | 0.79388 | 0.77626 | 0.32496 | 0.78741 | 0.85690 | 0.68176 | 0.51089 | 0.40482 | 0.33275 |
| 0.4           | 0.77536 | 0.96326 | 0.97653 | 0.73879 | 0.71803 | 0.26293 | 0.73411 | 0.81805 | 0.60930 | 0.42986 | 0.32757 | 0.26174 |
| 0.5           | 0.73048 | 0.95381 | 0.97044 | 0.68931 | 0.66629 | 0.22014 | 0.68732 | 0.78281 | 0.54805 | 0.36757 | 0.27145 | 0.21206 |
| 0.6           | 0.68936 | 0.94434 | 0.96430 | 0.64472 | 0.62010 | 0.18890 | 0.64590 | 0.75071 | 0.49573 | 0.31838 | 0.22905 | 0.17560 |
| 0.7           | 0.65161 | 0.93484 | 0.95811 | 0.60440 | 0.57868 | 0.16513 | 0.60903 | 0.72135 | 0.45063 | 0.27870 | 0.19605 | 0.14786 |
| 0.8           | 0.61688 | 0.92535 | 0.95188 | 0.56781 | 0.54139 | 0.14647 | 0.57602 | 0.69439 | 0.41145 | 0.24613 | 0.16975 | 0.12617 |
| 0.9           | 0.58487 | 0.91586 | 0.94563 | 0.53451 | 0.50769 | 0.13145 | 0.54627 | 0.66955 | 0.37716 | 0.21900 | 0.14839 | 0.10883 |
| 1.0           | 0.55530 | 0.90639 | 0.93938 | 0.50412 | 0.47713 | 0.11911 | 0.51935 | 0.64658 | 0.34698 | 0.19612 | 0.13077 | 0.09471 |
| 1.1           | 0.57078 | 0.91121 | 0.94258 | 0.52030 | 0.49351 | 0.12576 | 0.53267 | 0.65750 | 0.36412 | 0.20993 | 0.14188 | 0.10392 |
| 1.2           | 0.58952 | 0.91688 | 0.94636 | 0.53990 | 0.51338 | 0.13425 | 0.54930 | 0.67121 | 0.38488 | 0.22683 | 0.15553 | 0.11525 |
| 1.3           | 0.61104 | 0.92305 | 0.95045 | 0.56257 | 0.53648 | 0.14511 | 0.56904 | 0.68735 | 0.40937 | 0.24736 | 0.17234 | 0.12934 |
| 1.4           | 0.63568 | 0.92967 | 0.95481 | 0.58877 | 0.56330 | 0.15926 | 0.59240 | 0.70623 | 0.43840 | 0.27265 | 0.19346 | 0.14723 |
| 1.5           | 0.66388 | 0.93674 | 0.95945 | 0.61909 | 0.59455 | 0.17821 | 0.62009 | 0.72823 | 0.47308 | 0.30438 | 0.22065 | 0.17064 |
| 1.6           | 0.69623 | 0.94425 | 0.96436 | 0.65431 | 0.63112 | 0.20462 | 0.65307 | 0.75391 | 0.51498 | 0.34515 | 0.25679 | 0.20244 |
| 1.7           | 0.73345 | 0.95220 | 0.96952 | 0.69544 | 0.67420 | 0.24353 | 0.69261 | 0.78394 | 0.56632 | 0.39919 | 0.30697 | 0.24796 |
| 1.8           | 0.77648 | 0.96060 | 0.97494 | 0.74384 | 0.72541 | 0.30594 | 0.74051 | 0.81923 | 0.63035 | 0.47383 | 0.38095 | 0.31822 |
| 1.9           | 0.82657 | 0.96944 | 0.98061 | 0.80131 | 0.78698 | 0.42086 | 0.79928 | 0.86098 | 0.71200 | 0.58293 | 0.50011 | 0.43997 |
| 2.0           | 0.88531 | 0.97872 | 0.98654 | 0.87035 | 0.86202 | 0.69615 | 0.87263 | 0.91082 | 0.81912 | 0.75603 | 0.72131 | 0.69842 |
| 2.1           | 0.89100 | 0.97971 | 0.98715 | 0.87688 | 0.86905 | 0.71974 | 0.87927 | 0.91535 | 0.82877 | 0.77069 | 0.73976 | 0.72008 |
| 2.2           | 0.89444 | 0.98034 | 0.98754 | 0.88077 | 0.87319 | 0.72892 | 0.88311 | 0.91804 | 0.83420 | 0.77806 | 0.74819 | 0.72919 |
| 2.3           | 0.89743 | 0.98089 | 0.98789 | 0.88415 | 0.87679 | 0.73685 | 0.88645 | 0.92037 | 0.83890 | 0.78444 | 0.75547 | 0.73707 |
| 2.4           | 0.90005 | 0.98137 | 0.98819 | 0.88712 | 0.87995 | 0.74379 | 0.88937 | 0.92242 | 0.84304 | 0.79003 | 0.76185 | 0.74395 |
| 2.5           | 0.90237 | 0.98180 | 0.98846 | 0.88975 | 0.88275 | 0.74990 | 0.89197 | 0.92424 | 0.84670 | 0.79498 | 0.76748 | 0.75003 |
| 2.6           | 0.90446 | 0.98218 | 0.98870 | 0.89211 | 0.88526 | 0.75535 | 0.89429 | 0.92587 | 0.84997 | 0.79940 | 0.77251 | 0.75545 |
| 2.7           | 0.90634 | 0.98253 | 0.98892 | 0.89423 | 0.88752 | 0.76025 | 0.89638 | 0.92733 | 0.85294 | 0.80338 | 0.77704 | 0.76033 |
| 2.8           | 0.90805 | 0.98284 | 0.98911 | 0.89616 | 0.88958 | 0.76469 | 0.89828 | 0.92866 | 0.85566 | 0.80699 | 0.78114 | 0.76476 |
| 2.9           | 0.90961 | 0.98313 | 0.98929 | 0.89793 | 0.89146 | 0.76874 | 0.90001 | 0.92988 | 0.85811 | 0.81028 | 0.78489 | 0.76879 |
| 3.0           | 0.91104 | 0.98339 | 0.98946 | 0.89955 | 0.89318 | 0.77246 | 0.90161 | 0.93099 | 0.86036 | 0.81332 | 0.78833 | 0.77250 |
| 3.1           | 0.91238 | 0.98364 | 0.98961 | 0.90106 | 0.89478 | 0.77588 | 0.90309 | 0.93204 | 0.86248 | 0.81610 | 0.79151 | 0.77593 |
| 3.2           | 0.91361 | 0.98386 | 0.98975 | 0.90245 | 0.89626 | 0.77906 | 0.90446 | 0.93300 | 0.86442 | 0.81870 | 0.79446 | 0.77910 |
| 3.3           | 0.91476 | 0.98407 | 0.98989 | 0.90375 | 0.89765 | 0.78202 | 0.90574 | 0.93389 | 0.86622 | 0.82112 | 0.79721 | 0.78206 |

**Table S4.** Core power transition of the C5G7-TD benchmark problem (2/3)

| Time<br>(sec) | TD 1-1  | TD 1-2  | TD 1-3  | TD 1-4  | TD 1-5  | TD 2-1  | TD 2-2  | TD 2-3  | TD 3-1  | TD 3-2  | TD 3-3  | TD 3-4  |
|---------------|---------|---------|---------|---------|---------|---------|---------|---------|---------|---------|---------|---------|
| 3.4           | 0.91584 | 0.98427 | 0.99001 | 0.90497 | 0.89894 | 0.78479 | 0.90693 | 0.93473 | 0.86792 | 0.82338 | 0.79977 | 0.78483 |
| 3.5           | 0.91685 | 0.98446 | 0.99013 | 0.90612 | 0.90016 | 0.78739 | 0.90806 | 0.93552 | 0.86951 | 0.82551 | 0.80219 | 0.78743 |
| 3.6           | 0.91781 | 0.98463 | 0.99024 | 0.90719 | 0.90131 | 0.78985 | 0.90912 | 0.93626 | 0.87101 | 0.82752 | 0.80446 | 0.78988 |
| 3.7           | 0.91871 | 0.98480 | 0.99034 | 0.90822 | 0.90239 | 0.79217 | 0.91012 | 0.93697 | 0.87243 | 0.82942 | 0.80662 | 0.79220 |
| 3.8           | 0.91957 | 0.98496 | 0.99044 | 0.90918 | 0.90342 | 0.79437 | 0.91107 | 0.93763 | 0.87377 | 0.83122 | 0.80866 | 0.79440 |
| 3.9           | 0.92038 | 0.98510 | 0.99053 | 0.91011 | 0.90440 | 0.79646 | 0.91197 | 0.93827 | 0.87506 | 0.83293 | 0.81060 | 0.79649 |
| 4.0           | 0.92115 | 0.98525 | 0.99062 | 0.91098 | 0.90534 | 0.79846 | 0.91284 | 0.93887 | 0.87628 | 0.83457 | 0.81246 | 0.79849 |
| 4.1           | 0.92191 | 0.98539 | 0.99071 | 0.91183 | 0.90624 | 0.80037 | 0.91367 | 0.93945 | 0.87746 | 0.83615 | 0.81425 | 0.80038 |
| 4.2           | 0.92262 | 0.98552 | 0.99079 | 0.91264 | 0.90709 | 0.80219 | 0.91446 | 0.94000 | 0.87858 | 0.83765 | 0.81595 | 0.80220 |
| 4.3           | 0.92331 | 0.98564 | 0.99087 | 0.91341 | 0.90792 | 0.80394 | 0.91522 | 0.94053 | 0.87965 | 0.83908 | 0.81758 | 0.80395 |
| 4.4           | 0.92396 | 0.98576 | 0.99094 | 0.91415 | 0.90871 | 0.80563 | 0.91595 | 0.94104 | 0.88068 | 0.84046 | 0.81914 | 0.80563 |
| 4.5           | 0.92460 | 0.98588 | 0.99101 | 0.91487 | 0.90947 | 0.80725 | 0.91665 | 0.94154 | 0.88168 | 0.84179 | 0.82065 | 0.80725 |
| 4.6           | 0.92521 | 0.98599 | 0.99108 | 0.91555 | 0.91020 | 0.80881 | 0.91732 | 0.94201 | 0.88264 | 0.84307 | 0.82210 | 0.80881 |
| 4.7           | 0.92580 | 0.98610 | 0.99115 | 0.91622 | 0.91091 | 0.81031 | 0.91798 | 0.94247 | 0.88356 | 0.84431 | 0.82351 | 0.81031 |
| 4.8           | 0.92637 | 0.98620 | 0.99122 | 0.91686 | 0.91159 | 0.81177 | 0.91861 | 0.94291 | 0.88446 | 0.84550 | 0.82486 | 0.81177 |
| 4.9           | 0.92692 | 0.98630 | 0.99128 | 0.91749 | 0.91225 | 0.81318 | 0.91922 | 0.94334 | 0.88532 | 0.84666 | 0.82618 | 0.81318 |
| 5.0           | 0.92745 | 0.98640 | 0.99134 | 0.91809 | 0.91289 | 0.81455 | 0.91981 | 0.94375 | 0.88616 | 0.84778 | 0.82744 | 0.81455 |
| 5.1           | 0.92797 | 0.98649 | 0.99140 | 0.91868 | 0.91353 | 0.81589 | 0.92039 | 0.94416 | 0.88698 | 0.84889 | 0.82869 | 0.81589 |
| 5.2           | 0.92848 | 0.98659 | 0.99146 | 0.91925 | 0.91413 | 0.81718 | 0.92095 | 0.94455 | 0.88778 | 0.84994 | 0.82989 | 0.81718 |
| 5.3           | 0.92897 | 0.98667 | 0.99151 | 0.91980 | 0.91472 | 0.81844 | 0.92149 | 0.94493 | 0.88854 | 0.85097 | 0.83106 | 0.81844 |
| 5.4           | 0.92944 | 0.98676 | 0.99157 | 0.92034 | 0.91529 | 0.81965 | 0.92201 | 0.94530 | 0.88929 | 0.85197 | 0.83219 | 0.81966 |
| 5.5           | 0.92991 | 0.98685 | 0.99162 | 0.92086 | 0.91585 | 0.82084 | 0.92253 | 0.94566 | 0.89002 | 0.85295 | 0.83330 | 0.82084 |
| 5.6           | 0.93036 | 0.98693 | 0.99167 | 0.92137 | 0.91639 | 0.82200 | 0.92303 | 0.94601 | 0.89073 | 0.85390 | 0.83437 | 0.82200 |
| 5.7           | 0.93080 | 0.98701 | 0.99172 | 0.92187 | 0.91692 | 0.82312 | 0.92352 | 0.94635 | 0.89142 | 0.85482 | 0.83542 | 0.82312 |
| 5.8           | 0.93123 | 0.98709 | 0.99177 | 0.92236 | 0.91744 | 0.82422 | 0.92399 | 0.94668 | 0.89210 | 0.85572 | 0.83644 | 0.82422 |
| 5.9           | 0.93165 | 0.98716 | 0.99182 | 0.92283 | 0.91794 | 0.82529 | 0.92445 | 0.94701 | 0.89275 | 0.85660 | 0.83744 | 0.82530 |
| 6.0           | 0.93205 | 0.98723 | 0.99186 | 0.92329 | 0.91843 | 0.82634 | 0.92491 | 0.94732 | 0.89340 | 0.85746 | 0.83842 | 0.82634 |
| 6.1           | 0.93246 | 0.98731 | 0.99191 | 0.92375 | 0.91892 | 0.82737 | 0.92535 | 0.94763 | 0.89403 | 0.85831 | 0.83937 | 0.82738 |
| 6.2           | 0.93285 | 0.98738 | 0.99195 | 0.92419 | 0.91939 | 0.82837 | 0.92579 | 0.94794 | 0.89465 | 0.85914 | 0.84031 | 0.82838 |
| 6.3           | 0.93323 | 0.98745 | 0.99199 | 0.92462 | 0.91985 | 0.82935 | 0.92621 | 0.94823 | 0.89525 | 0.85994 | 0.84122 | 0.82936 |
| 6.4           | 0.93360 | 0.98752 | 0.99204 | 0.92504 | 0.92029 | 0.83030 | 0.92662 | 0.94852 | 0.89583 | 0.86072 | 0.84210 | 0.83030 |
| 6.5           | 0.93397 | 0.98758 | 0.99208 | 0.92546 | 0.92073 | 0.83125 | 0.92703 | 0.94881 | 0.89641 | 0.86150 | 0.84298 | 0.83125 |
| 6.6           | 0.93433 | 0.98765 | 0.99212 | 0.92586 | 0.92116 | 0.83216 | 0.92742 | 0.94908 | 0.89697 | 0.86224 | 0.84383 | 0.83216 |
| 6.7           | 0.93468 | 0.98771 | 0.99216 | 0.92626 | 0.92159 | 0.83306 | 0.92781 | 0.94936 | 0.89753 | 0.86299 | 0.84467 | 0.83307 |

**Table S4.** Core power transition of the C5G7-TD benchmark problem (3/3)

| Time<br>(sec) | TD 1-1  | TD 1-2  | TD 1-3  | TD 1-4  | TD 1-5  | TD 2-1  | TD 2-2  | TD 2-3  | TD 3-1  | TD 3-2  | TD 3-3  | TD 3-4  |
|---------------|---------|---------|---------|---------|---------|---------|---------|---------|---------|---------|---------|---------|
| 6.8           | 0.93502 | 0.98777 | 0.99220 | 0.92664 | 0.92200 | 0.83394 | 0.92819 | 0.94962 | 0.89806 | 0.86370 | 0.84548 | 0.83394 |
| 6.9           | 0.93536 | 0.98784 | 0.99223 | 0.92702 | 0.92240 | 0.83480 | 0.92856 | 0.94988 | 0.89859 | 0.86441 | 0.84629 | 0.83480 |
| 7.0           | 0.93569 | 0.98789 | 0.99227 | 0.92740 | 0.92280 | 0.83564 | 0.92893 | 0.95014 | 0.89911 | 0.86511 | 0.84708 | 0.83565 |
| 7.1           | 0.93602 | 0.98796 | 0.99231 | 0.92777 | 0.92319 | 0.83648 | 0.92929 | 0.95039 | 0.89963 | 0.86579 | 0.84785 | 0.83649 |
| 7.2           | 0.93633 | 0.98801 | 0.99234 | 0.92813 | 0.92357 | 0.83730 | 0.92964 | 0.95064 | 0.90013 | 0.86646 | 0.84861 | 0.83730 |
| 7.3           | 0.93665 | 0.98807 | 0.99238 | 0.92848 | 0.92395 | 0.83810 | 0.92999 | 0.95088 | 0.90062 | 0.86712 | 0.84936 | 0.83811 |
| 7.4           | 0.93695 | 0.98812 | 0.99241 | 0.92883 | 0.92432 | 0.83889 | 0.93033 | 0.95112 | 0.90110 | 0.86776 | 0.85009 | 0.83889 |
| 7.5           | 0.93725 | 0.98818 | 0.99245 | 0.92917 | 0.92468 | 0.83966 | 0.93066 | 0.95135 | 0.90157 | 0.86840 | 0.85081 | 0.83966 |
| 7.6           | 0.93755 | 0.98823 | 0.99248 | 0.92950 | 0.92504 | 0.84042 | 0.93099 | 0.95158 | 0.90204 | 0.86902 | 0.85151 | 0.84042 |
| 7.7           | 0.93784 | 0.98828 | 0.99251 | 0.92983 | 0.92538 | 0.84116 | 0.93131 | 0.95180 | 0.90250 | 0.86963 | 0.85220 | 0.84117 |
| 7.8           | 0.93812 | 0.98834 | 0.99254 | 0.93015 | 0.92573 | 0.84189 | 0.93162 | 0.95202 | 0.90294 | 0.87023 | 0.85288 | 0.84190 |
| 7.9           | 0.93840 | 0.98839 | 0.99258 | 0.93047 | 0.92606 | 0.84261 | 0.93193 | 0.95224 | 0.90338 | 0.87082 | 0.85355 | 0.84262 |
| 8.0           | 0.93868 | 0.98844 | 0.99261 | 0.93078 | 0.92639 | 0.84332 | 0.93224 | 0.95245 | 0.90382 | 0.87140 | 0.85421 | 0.84332 |
| 8.1           | 0.93895 | 0.98849 | 0.99264 | 0.93109 | 0.92672 | 0.84401 | 0.93254 | 0.95266 | 0.90425 | 0.87197 | 0.85486 | 0.84402 |
| 8.2           | 0.93922 | 0.98853 | 0.99267 | 0.93139 | 0.92704 | 0.84470 | 0.93284 | 0.95287 | 0.90467 | 0.87254 | 0.85550 | 0.84470 |
| 8.3           | 0.93948 | 0.98858 | 0.99270 | 0.93169 | 0.92736 | 0.84537 | 0.93313 | 0.95307 | 0.90508 | 0.87309 | 0.85612 | 0.84537 |
| 8.4           | 0.93974 | 0.98863 | 0.99272 | 0.93198 | 0.92767 | 0.84603 | 0.93341 | 0.95327 | 0.90548 | 0.87363 | 0.85674 | 0.84603 |
| 8.5           | 0.93999 | 0.98867 | 0.99275 | 0.93226 | 0.92797 | 0.84668 | 0.93369 | 0.95347 | 0.90588 | 0.87416 | 0.85734 | 0.84668 |
| 8.6           | 0.94024 | 0.98872 | 0.99278 | 0.93254 | 0.92827 | 0.84732 | 0.93397 | 0.95366 | 0.90627 | 0.87469 | 0.85793 | 0.84732 |
| 8.7           | 0.94049 | 0.98876 | 0.99281 | 0.93282 | 0.92857 | 0.84795 | 0.93424 | 0.95385 | 0.90666 | 0.87520 | 0.85852 | 0.84795 |
| 8.8           | 0.94073 | 0.98880 | 0.99283 | 0.93309 | 0.92886 | 0.84857 | 0.93451 | 0.95404 | 0.90704 | 0.87571 | 0.85910 | 0.84857 |
| 8.9           | 0.94097 | 0.98885 | 0.99286 | 0.93336 | 0.92914 | 0.84918 | 0.93477 | 0.95422 | 0.90741 | 0.87621 | 0.85966 | 0.84918 |
| 9.0           | 0.94120 | 0.98889 | 0.99289 | 0.93363 | 0.92942 | 0.84978 | 0.93503 | 0.95441 | 0.90778 | 0.87671 | 0.86022 | 0.84978 |
| 9.1           | 0.94143 | 0.98893 | 0.99291 | 0.93389 | 0.92970 | 0.85037 | 0.93529 | 0.95458 | 0.90815 | 0.87719 | 0.86078 | 0.85038 |
| 9.2           | 0.94166 | 0.98897 | 0.99294 | 0.93415 | 0.92998 | 0.85095 | 0.93554 | 0.95476 | 0.90851 | 0.87767 | 0.86132 | 0.85096 |
| 9.3           | 0.94188 | 0.98901 | 0.99296 | 0.93440 | 0.93025 | 0.85153 | 0.93578 | 0.95493 | 0.90886 | 0.87814 | 0.86185 | 0.85153 |
| 9.4           | 0.94210 | 0.98905 | 0.99299 | 0.93465 | 0.93051 | 0.85209 | 0.93603 | 0.95510 | 0.90920 | 0.87861 | 0.86238 | 0.85210 |
| 9.5           | 0.94232 | 0.98909 | 0.99301 | 0.93489 | 0.93077 | 0.85265 | 0.93627 | 0.95527 | 0.90955 | 0.87906 | 0.86290 | 0.85265 |
| 9.6           | 0.94253 | 0.98913 | 0.99303 | 0.93514 | 0.93103 | 0.85320 | 0.93650 | 0.95544 | 0.90988 | 0.87951 | 0.86341 | 0.85320 |
| 9.7           | 0.94274 | 0.98917 | 0.99306 | 0.93537 | 0.93128 | 0.85374 | 0.93674 | 0.95560 | 0.91021 | 0.87996 | 0.86391 | 0.85374 |
| 9.8           | 0.94295 | 0.98920 | 0.99308 | 0.93561 | 0.93153 | 0.85427 | 0.93697 | 0.95576 | 0.91054 | 0.88040 | 0.86441 | 0.85428 |
| 9.9           | 0.94316 | 0.98924 | 0.99310 | 0.93584 | 0.93178 | 0.85480 | 0.93719 | 0.95592 | 0.91086 | 0.88083 | 0.86490 | 0.85480 |
| 10.0          | 0.94336 | 0.98928 | 0.99312 | 0.93607 | 0.93202 | 0.85532 | 0.93742 | 0.95607 | 0.91118 | 0.88125 | 0.86539 | 0.85533 |

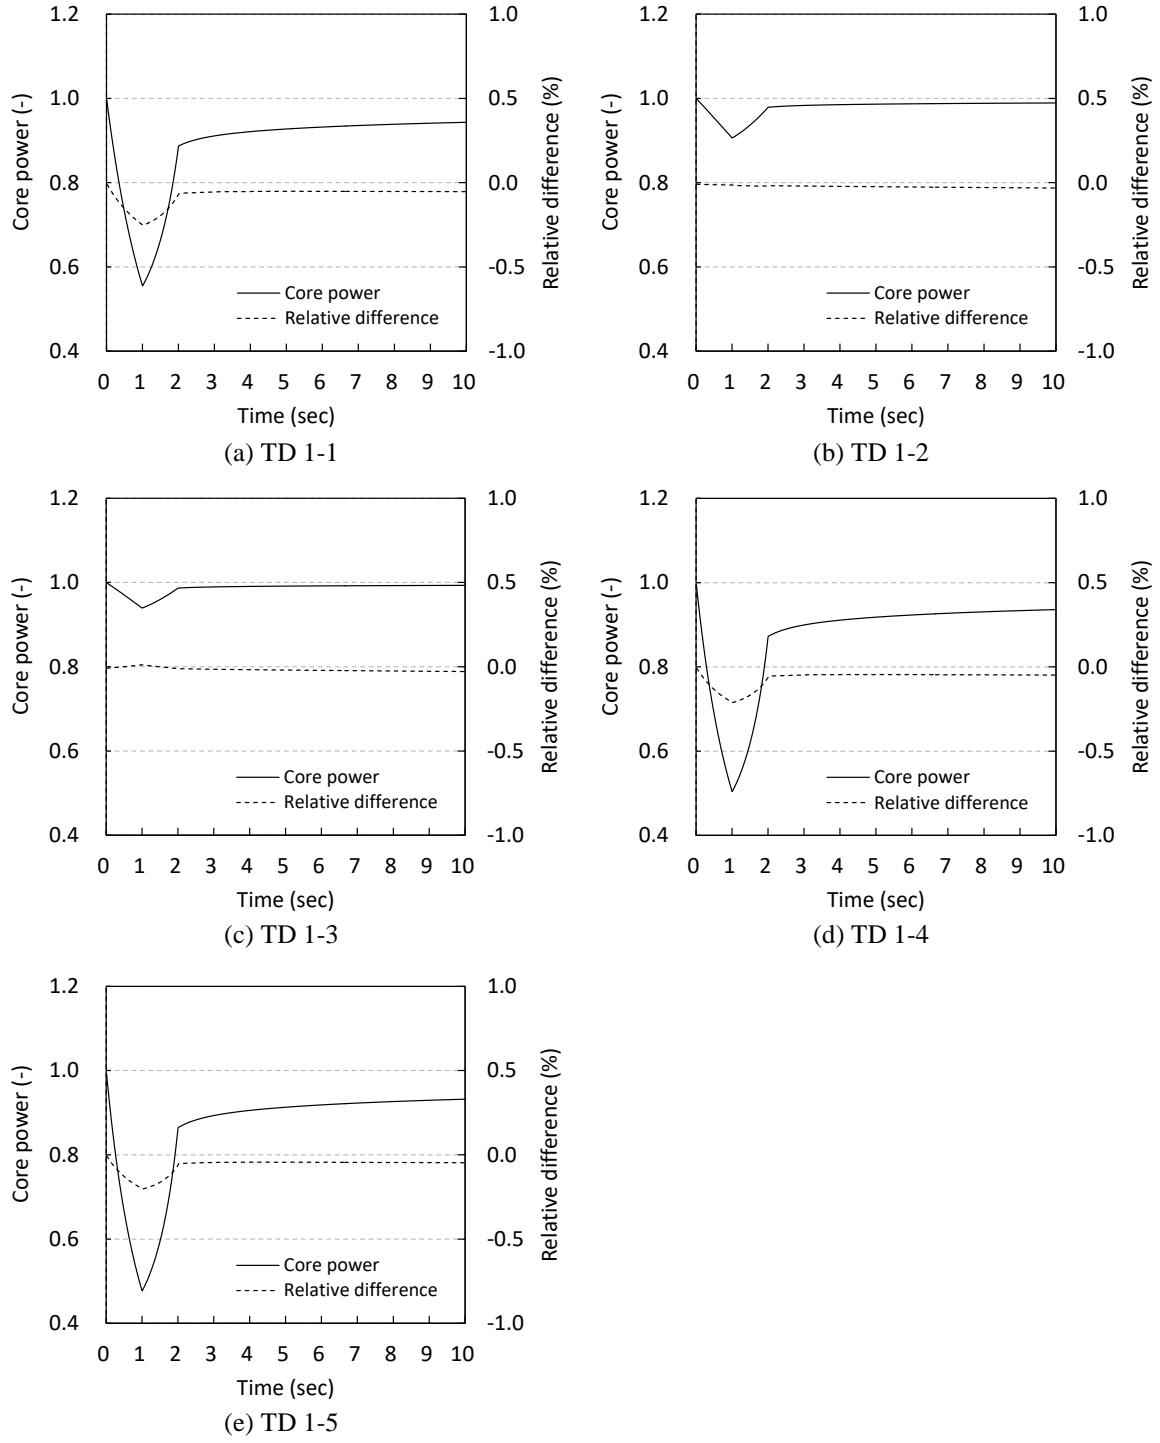

**Figure S2.** Comparison of the core power transition with MPACT (1/3)

$$\text{Relative difference (\%)} = \frac{P_{\text{present study}} - P_{\text{MPACT}}}{P_{\text{MPACT}}} \times 100 \quad (P: \text{core power}).$$

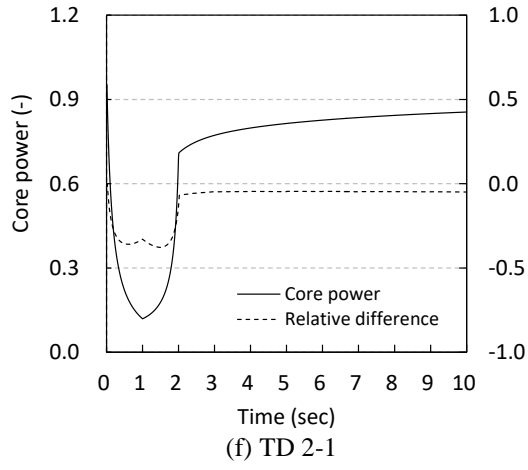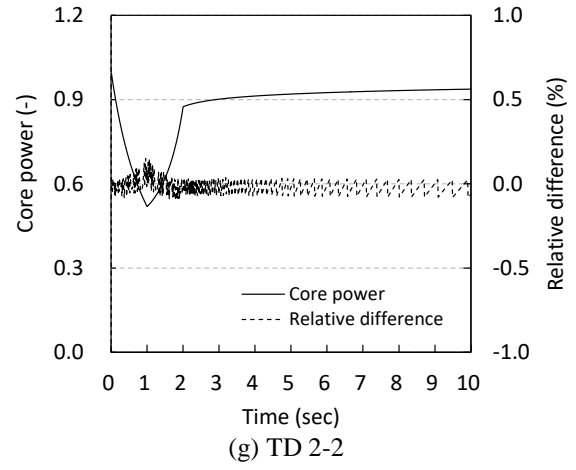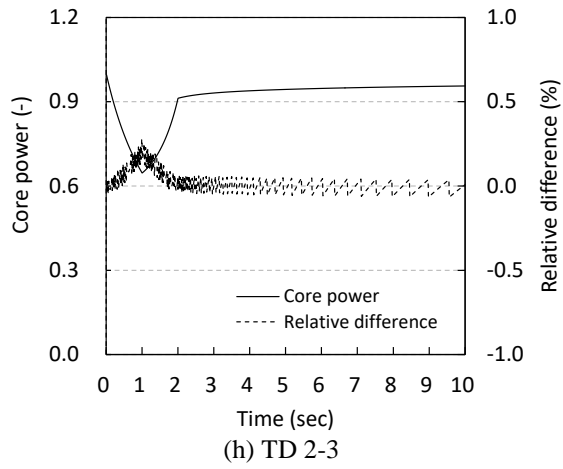

**Figure S2.** Comparison of the core power transition with MPACT (2/3)



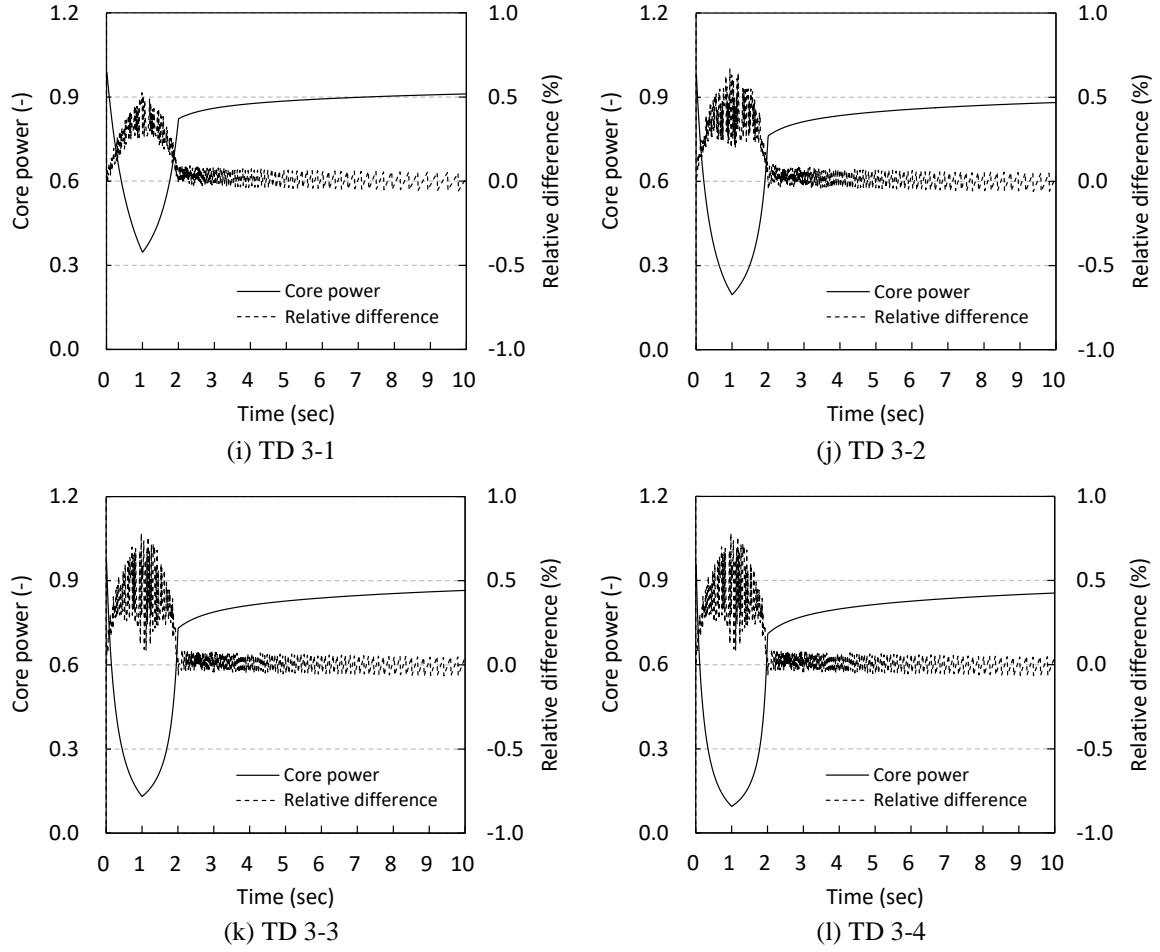

**Figure S2.** Comparison of the core power transition with MPACT (3/3)

Since the reference calculation results of MPACT are provided in only 3 effective digits for TD 2-2 ~ TD 3-4 [6], the relative difference between the present study and the MPACT for them includes larger rounding error than TD 1-1 ~ TD 2-1.
